# Supplementary material for: Co-delivery of doxorubicin and siRNA using octreotide-conjugated gold nanorods for targeted neuroendocrine cancer therapy
Source: Royal Society of Chemistry journal article supplement (doi:10.1039/c2nr31853a), 2012-01-01
Supplement: c2nr31853a.pdf [file c2nr31853a.pdf]

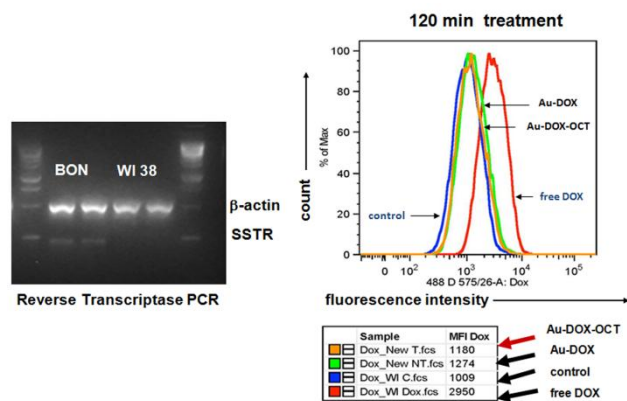

**Fig. S1** Flow cytometry histogram profiles of DOX fluorescence in WI38 pulmonary fibroblasts incubated with fresh media (control), free DOX, Au-DOX, or Au-DOX-OCT for 120 min (DOX concentration: 1  $\mu$ g/mL).

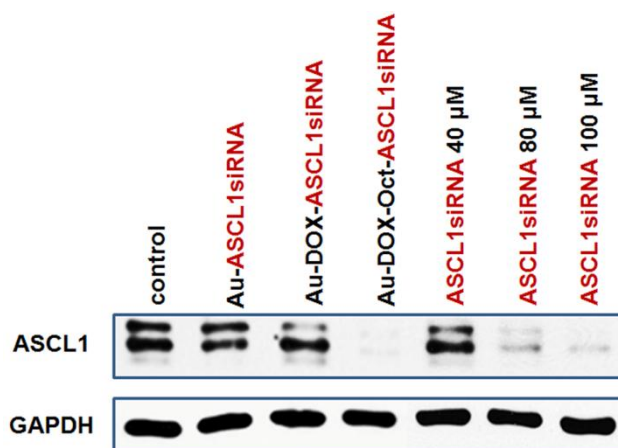

**Fig. S2** Comparison of ASCL1 knockdown by Au-DOX-OCT-ASCL1 siRNA (32  $\mu$ M of ASCL1 siRNA) and ASCL1 siRNA transfected by lipofectamine (40, 80, and 100  $\mu$ M) using Western blot analyses. GAPDH was used as the protein loading control.
